# Supplementary material
Source: bioRxiv or medRxiv preprint supplement (https://www.biorxiv.org/highwire/filestream/101088/field_highwire_adjunct_files/11/324509-4.pdf)
Supplement: Supplementary file [file 324509-4.pdf]

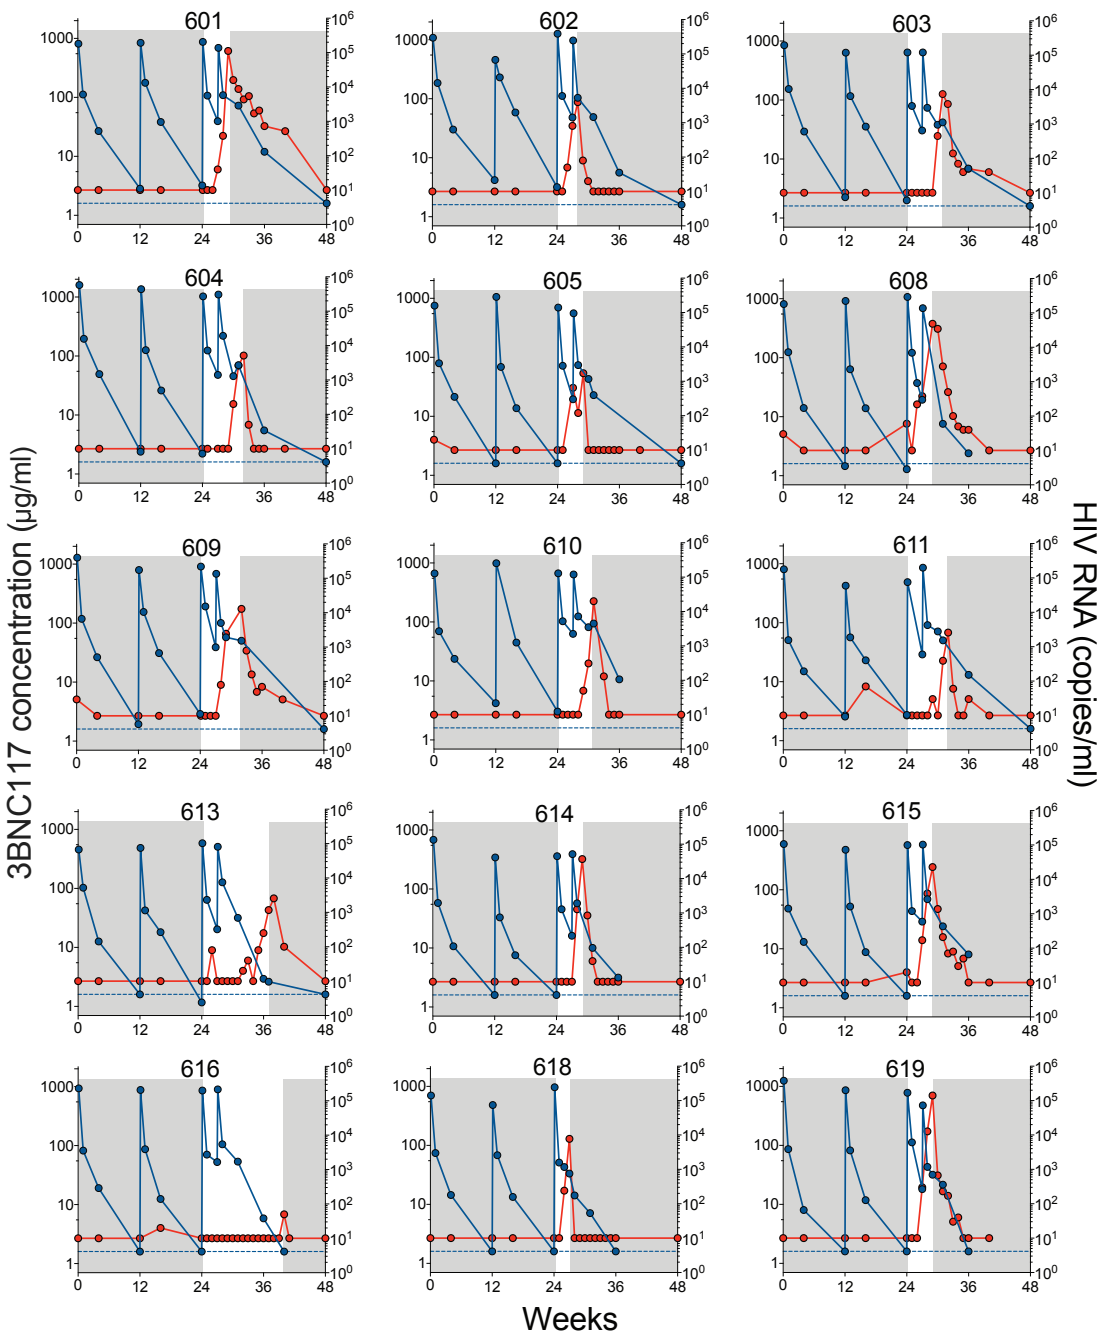

**Supplementary Figure 4.** Plasma viral loads and 3BNC117 levels. The left y-axis shows 3BNC117 levels (blue curves), the right y-axis shows plasma viral loads in RNA copies/ml (red curves), and gray areas indicate ART use. Participant 616 did not demonstrate significant levels of viremia at rebound because the participant independently began ART when plasma viremia reached 100 copies/ml.
